# Supplementary material
Source: PubMed Central journal article supplement (PMC2830552)
Supplement: NIHMS123704-supplement-Fig_S2.pdf [file NIHMS123704-supplement-Fig_S2.pdf]

# Genome-Wide Overviews of MCC Tumor Samples

- Parameters for generating overviews:
  - CGH-explorer, version 3.1
  - Moving average fit plots
  - Neighborhood size of 29
  - Vertical plot range of -3.5 to 3.5
  - Autosomal chromosomes 1-22
  - Grid lines at 0 (2n), 1 (4n), 2 (8n), -1 (1n), -2 (0.5n)
  - Y-axis is log 2 ratio
  - Grey dots represent individual data points
  - Black line represents the line of “Moving Average Fit”

# MCCd1<sub>p</sub>

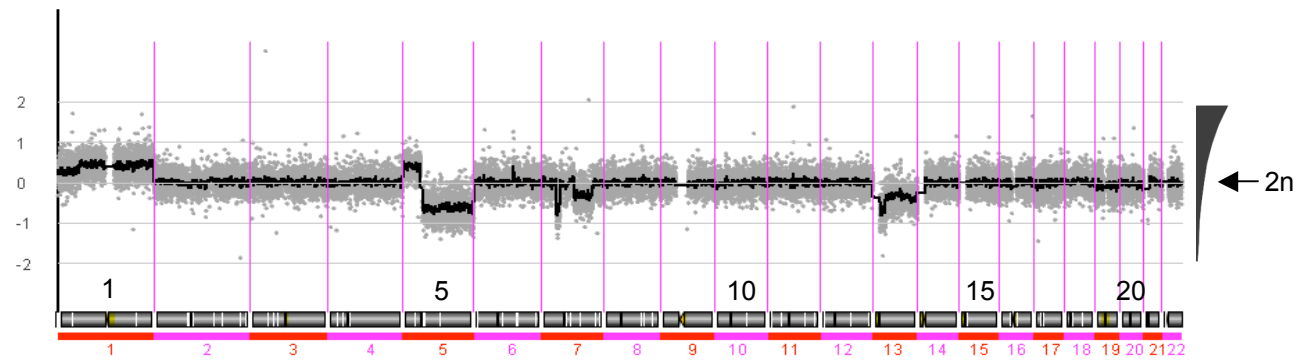

Garneski, et al.

# MCCd1<sub>m</sub>

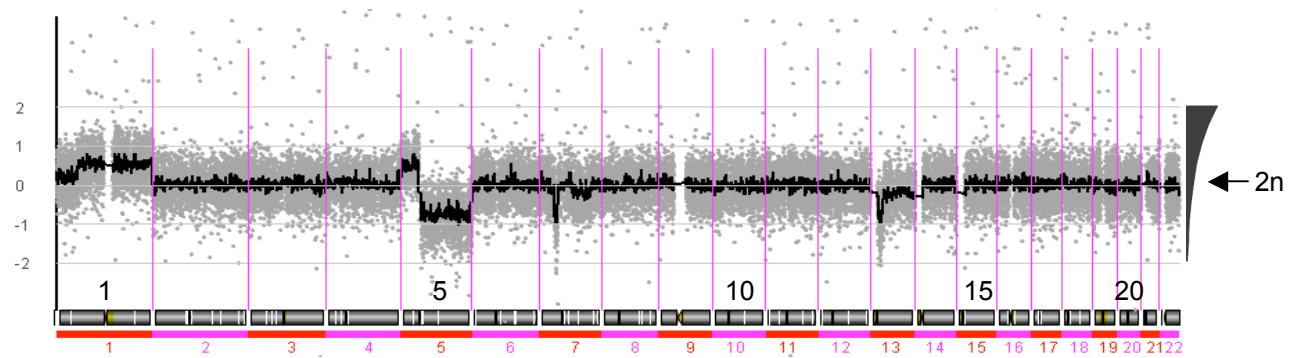

Garneski, et al.

# MCCd3<sub>p</sub>

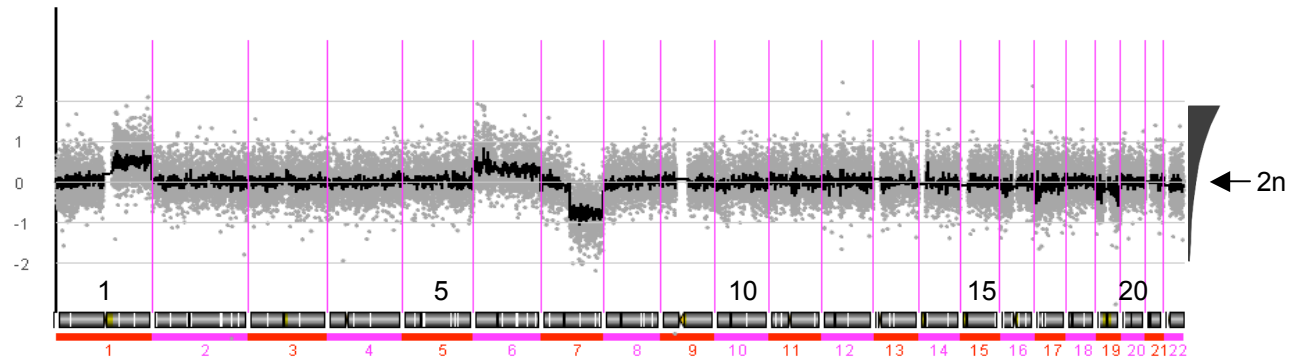

Garneski, et al.

# MCCd3<sub>m</sub>

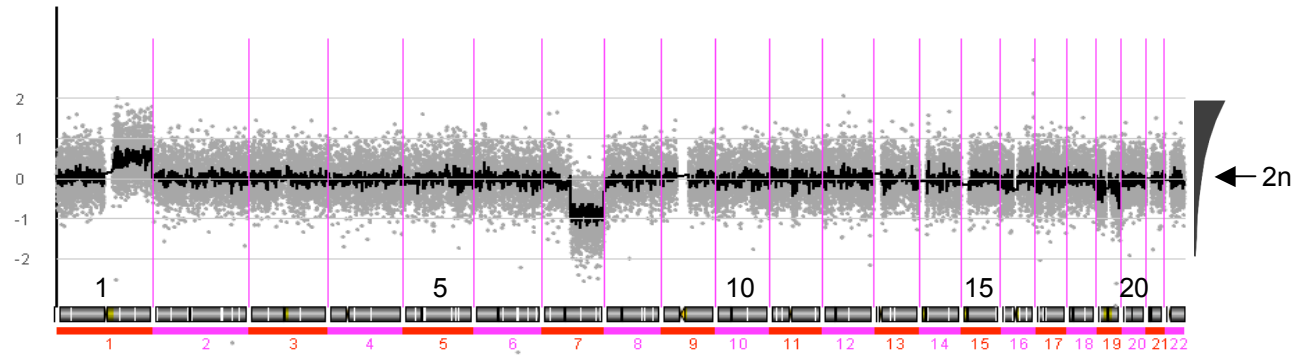

Garneski, et al.

# MCCd5

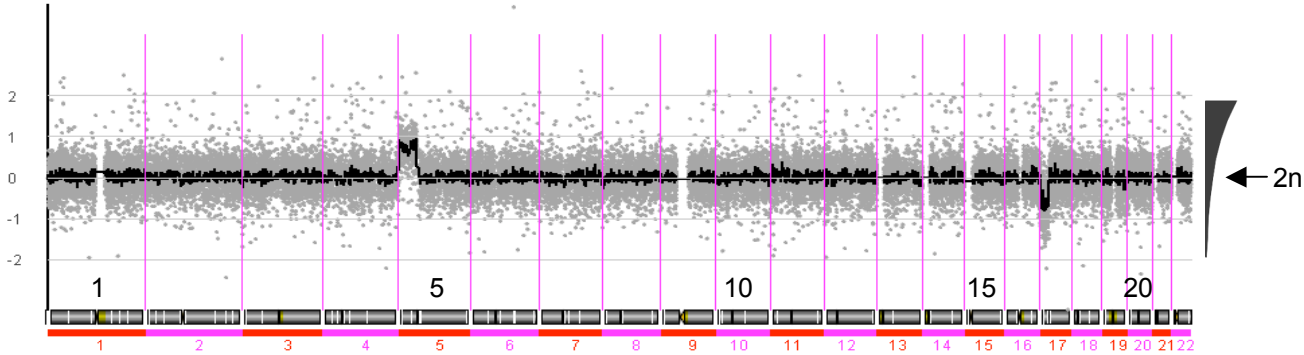

Garneski, et al.

# MCCd6

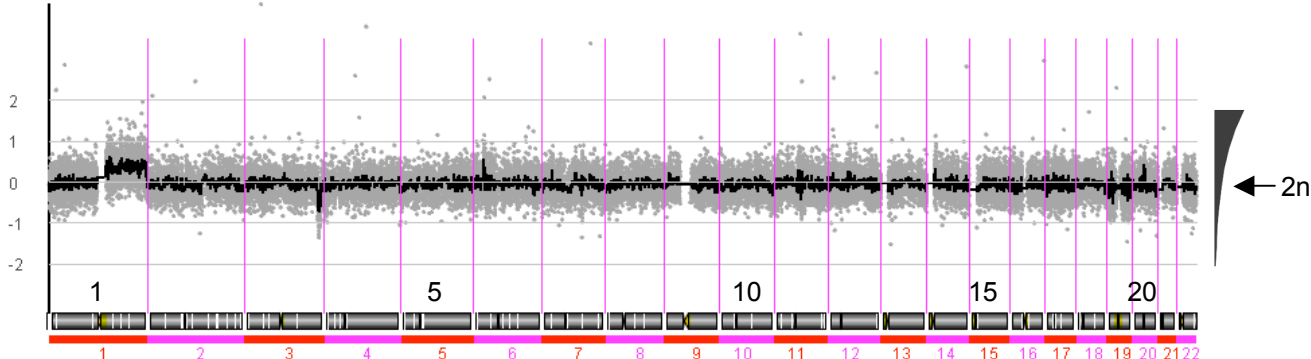

Garneski, et al.

# MCCd7

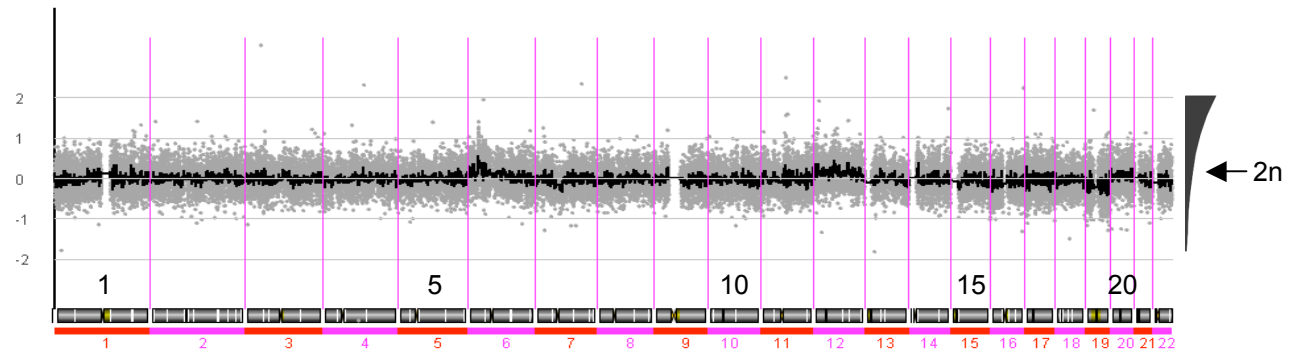

Garneski, et al.



# MCCd8

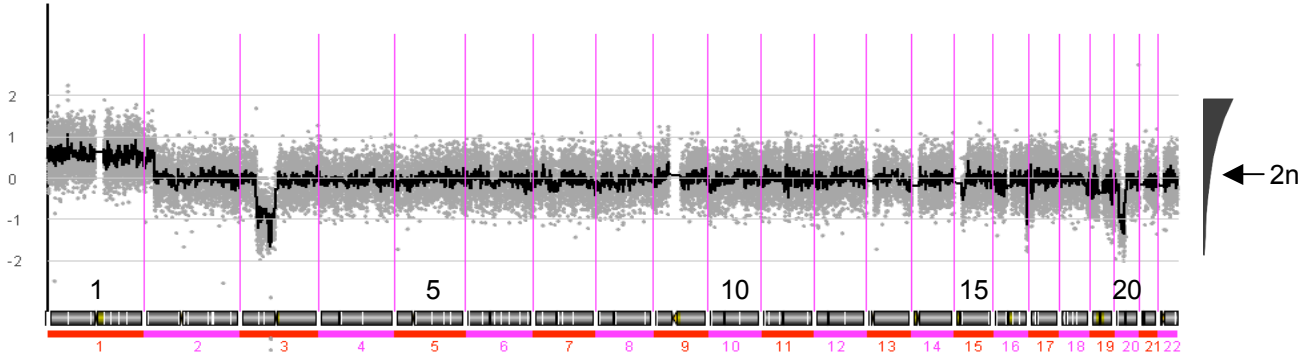

Garneski, et al.

# MCCd9

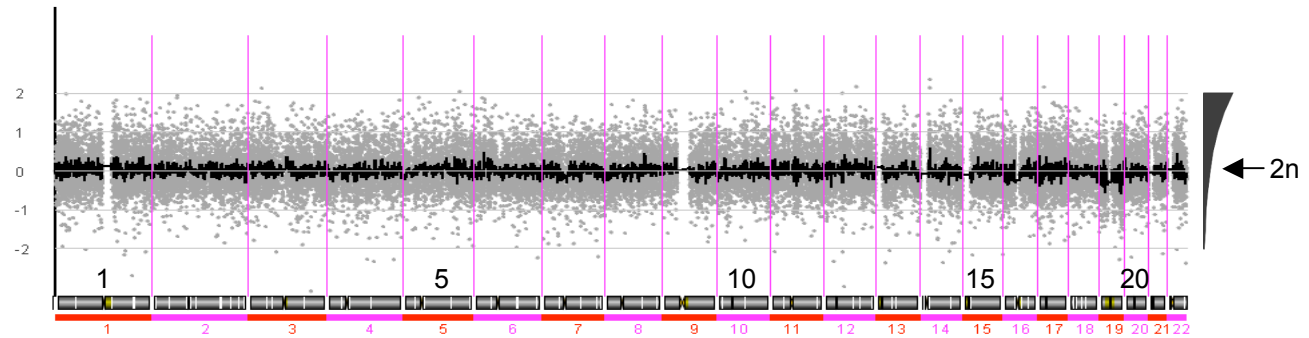

Garneski, et al.

# MCCd10

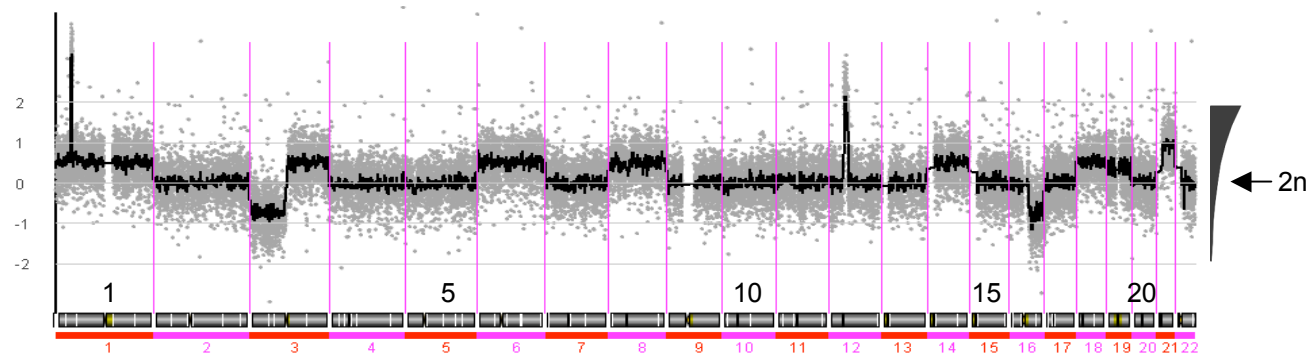

Garneski, et al.

# MCCd11

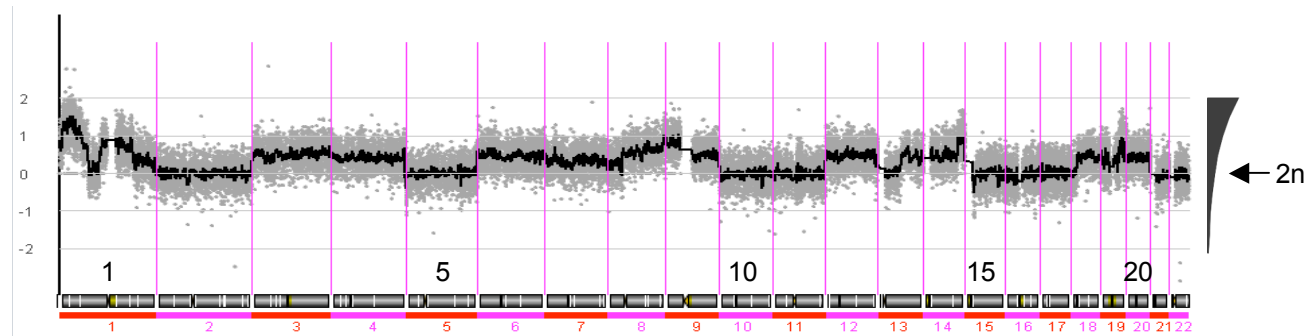

Garneski, et al.

# MCCd12

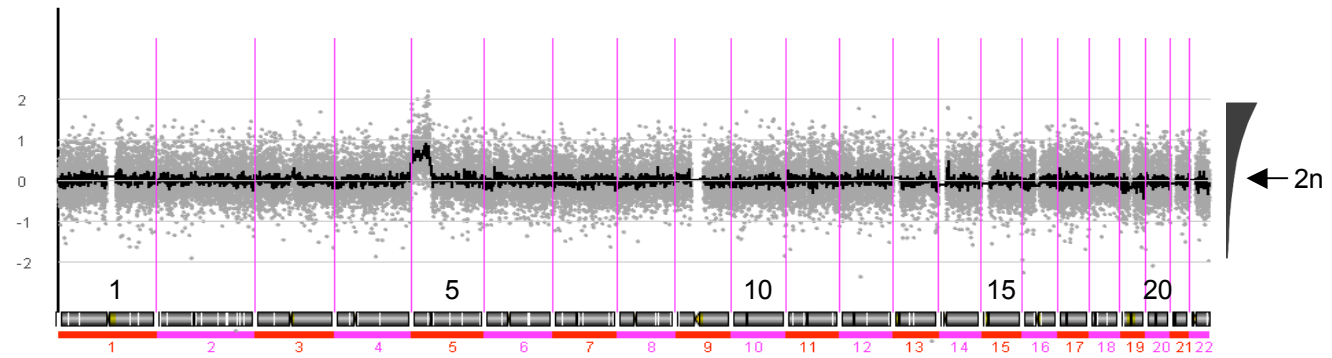

Garneski, et al.

# MCCd13

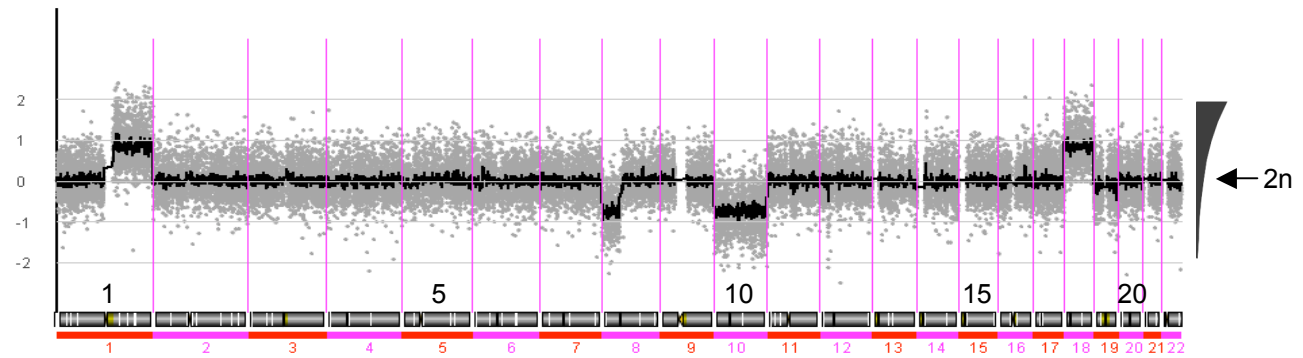

Garneski, et al.

# MCCd14

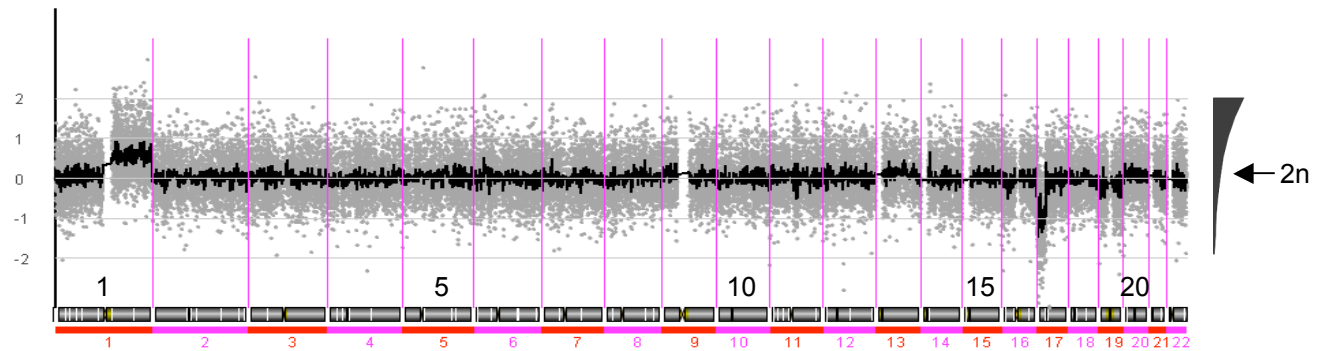

Garneski, et al.

# MCCd15

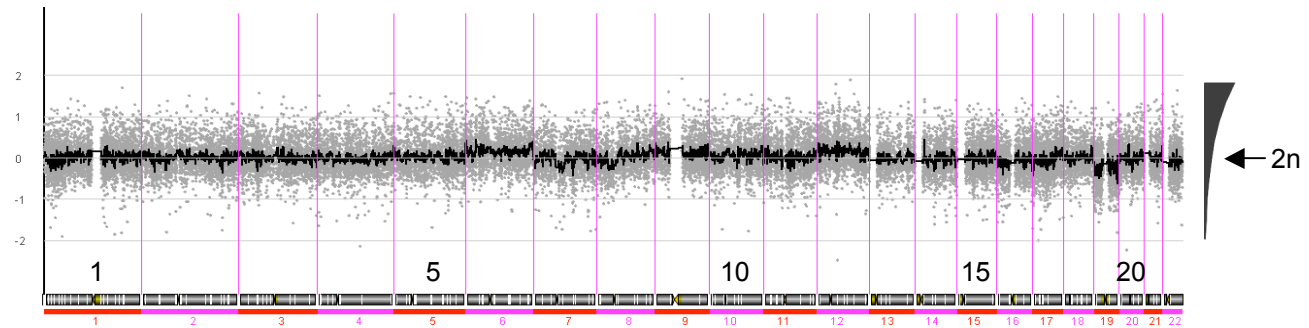

Garneski, et al.



# MCCd16

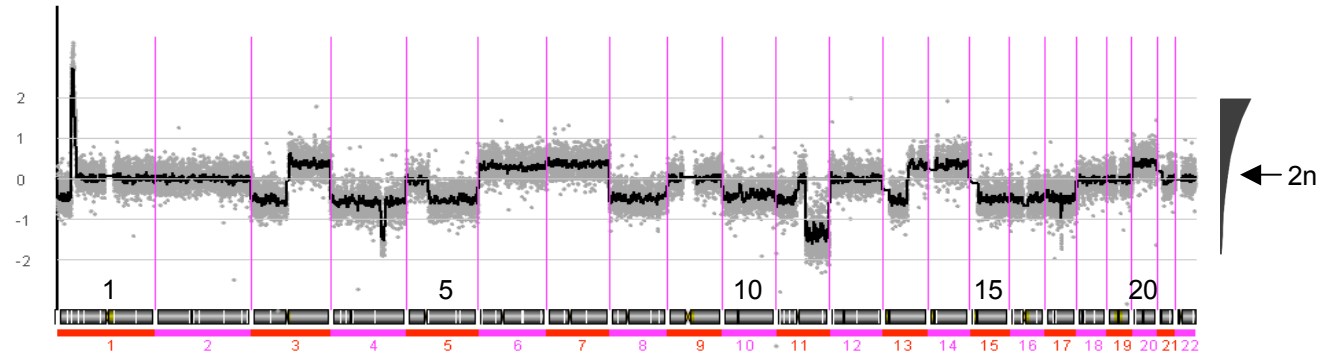

Garneski, et al.

# MCC<sub>L</sub>1T

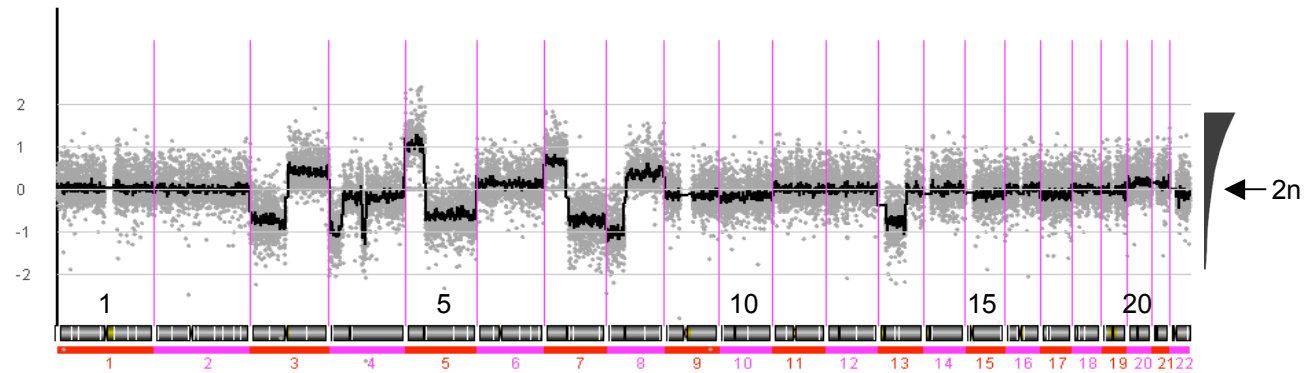

Garneski, et al.

# MCC<sub>L</sub>3T

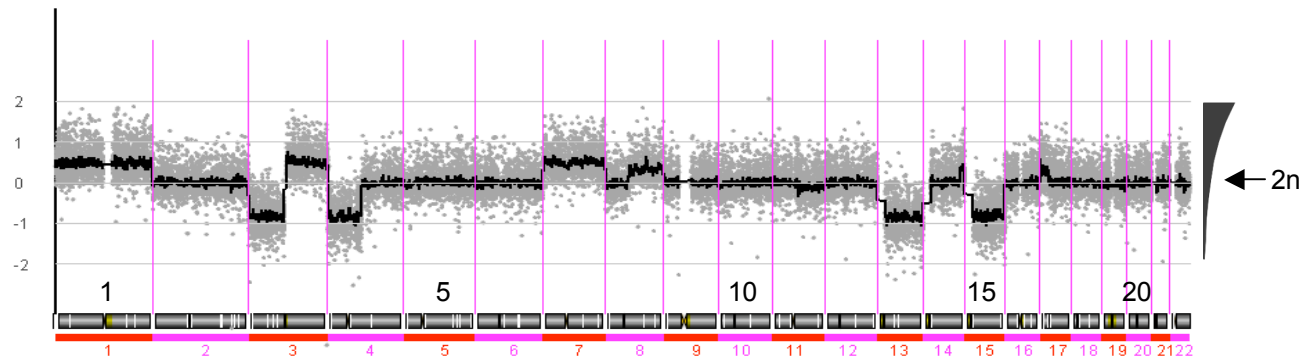

Garneski, et al.

# MCC<sub>L</sub>4T

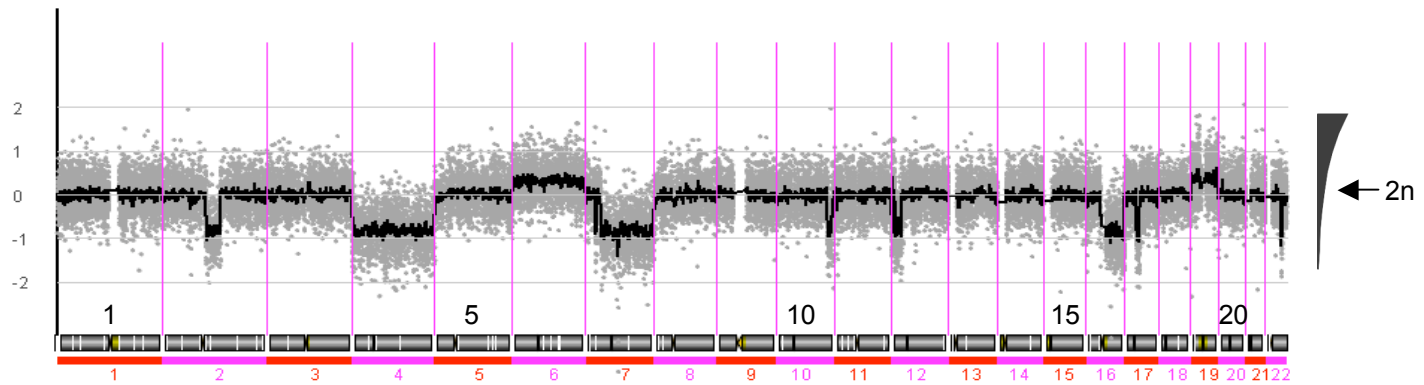

Garneski, et al.

# MCC<sub>L</sub>5T

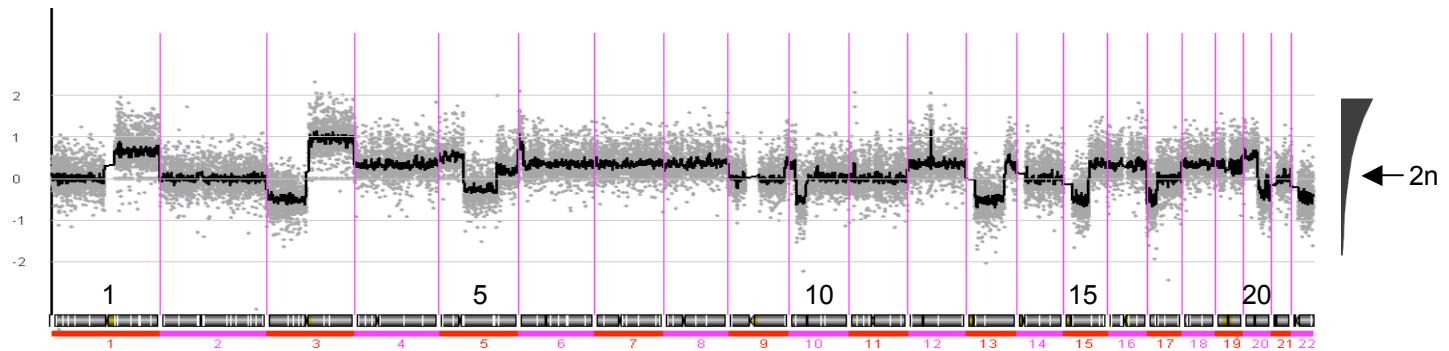

Garneski, et al.

# MCC<sub>L</sub>12T

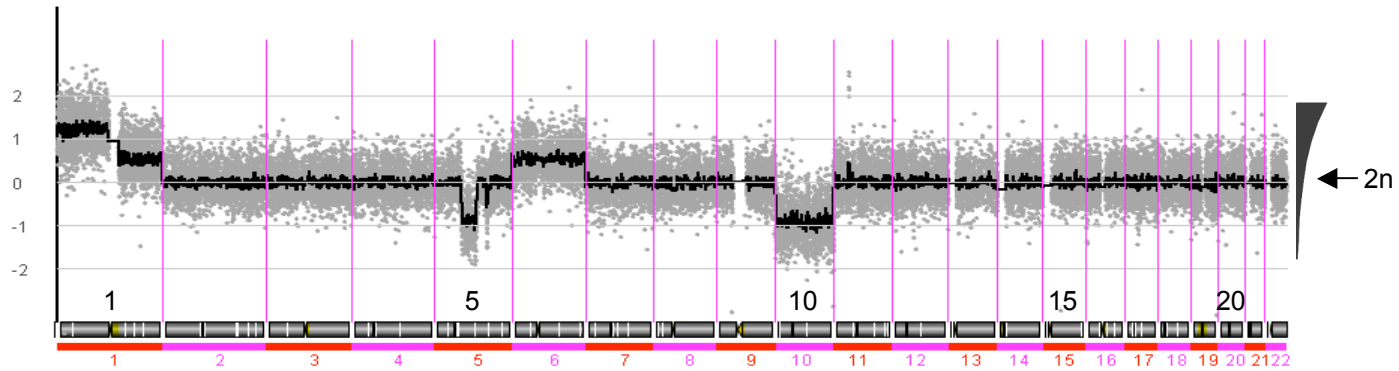

Garneski, et al.

# MCC<sub>L</sub>13T

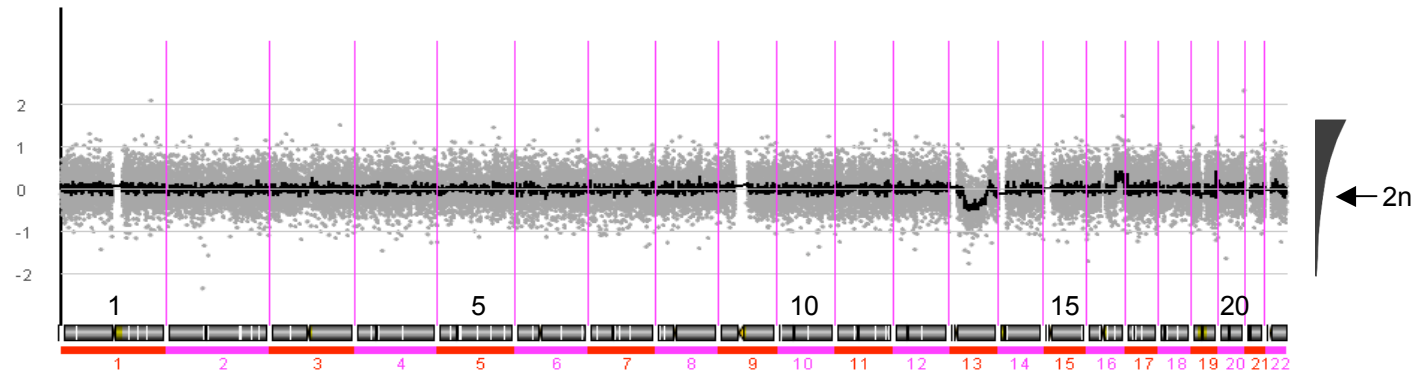

Garneski, et al.

# MCC<sub>L</sub>16T

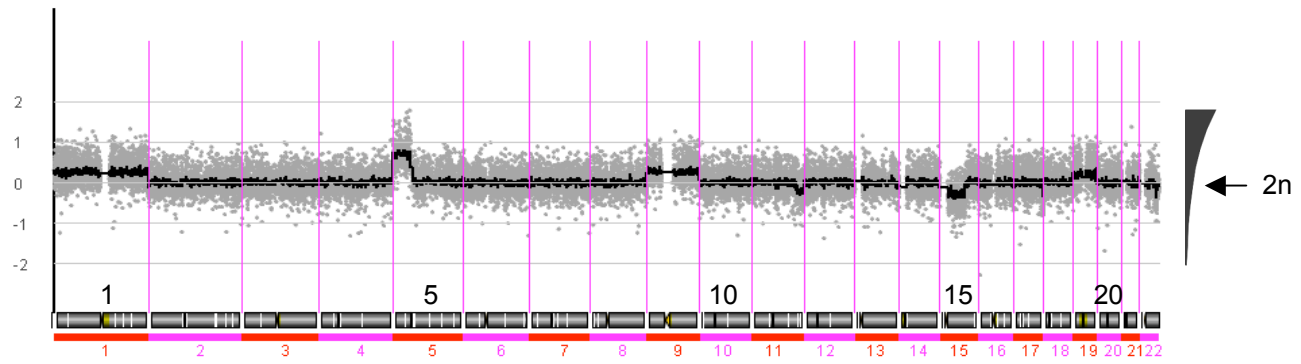

Garneski, et al.



# MCC<sub>L</sub>21T

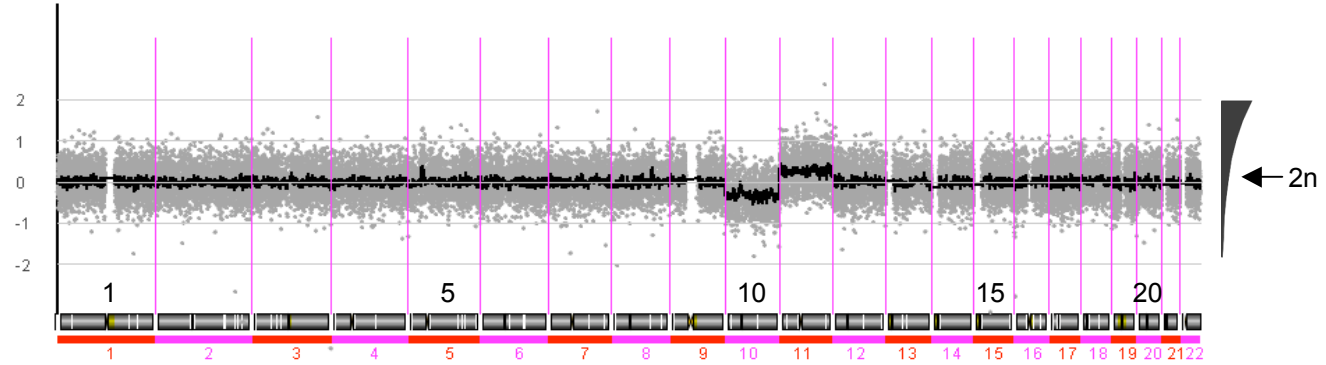

Garneski, et al.

# MCC<sub>L</sub>Sm

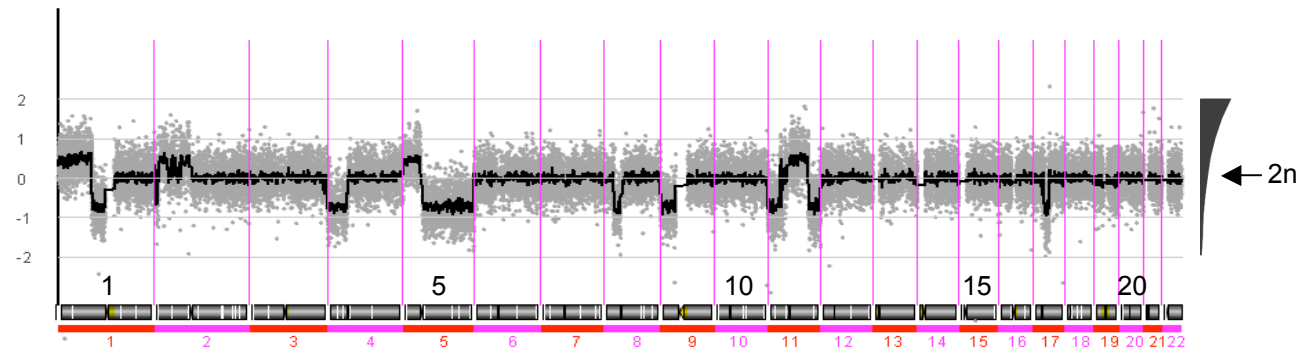

Garneski, et al.
