# Supplementary material
Source: PubMed Central journal article supplement (PMC2830552)
Supplement: NIHMS123704-supplement-Table_S1.pdf [file NIHMS123704-supplement-Table_S1.pdf]

**Supplementary Materials Table S1**

**Full List of Annotated Genes from Minimum Common Regions in Table 2**

| <b>Location and Type of Recurrent Copy Number Alteration</b> | <b>All Annotated Genes in Region</b>                                                                                                                                                                                                                                                                                                                                                                                                                                                                                                                                                                                                                                                         |
|--------------------------------------------------------------|----------------------------------------------------------------------------------------------------------------------------------------------------------------------------------------------------------------------------------------------------------------------------------------------------------------------------------------------------------------------------------------------------------------------------------------------------------------------------------------------------------------------------------------------------------------------------------------------------------------------------------------------------------------------------------------------|
| <b>Loss of 13q14.11-13q21.33</b>                             | LHFP, COG6, FOXO1A, MTRF1, NARG1L, KBTBD6, KBTBD7, MRPS31, SLC25A15, ELF1, WBP4, RGC32, NUFIP1, GTF2F2, TSC22D1, PIG38, EPSTI1, TNFSF11, AKAP11, DGKH, COG3, LRCH1, ESD, LCP1, CPB2, NURIT, DNAJC15, TPT1, HTR2A, SUCLA2, NUDT15, MED4, ITM2B, RB1, P2RY5, CYSLTR2, FNDC3A, MLNR, CDADC1, CAB39L, SETDB2, PHF11, RCBTB1, ARL11, EBPL, KPNA3, RFP2, KCNRG, DLEU2, DLEU1, DLEU7, GUCY1B2, DDX26, WDFY2, ATP7B, UTP14C, NEK3, THSD1, VPS36, CKAP2, SUGT1, LECT1, DIAPH3, TDRD3, PCDH20, PCDH9, KLHL1                                                                                                                                                                                            |
| <b>Loss of 5q12.3-5q21.1</b>                                 | RNF180, P18SRP, SDCCAG10, ADAMTS6, PPWD1, TRIM23, SGTB, NLN, ERBB2IP, SFRS12, PIK3R1, SLC30A5, CCNB1, CENPH, MAP1B, MRPS27, PTCO2, TNPO1, FOXD1, BTF3, ANKRA2, UTP15, RGNEF, ENC1, HEXB, GFM2, TINP1, C2GNT3, HMGCR, COL4A3BP, POLK, SV2C, IQGAP2, F2RL2, F2R, F2RL1, S100Z, CRHBP, AGGF1, PDE8B, WDR41, OTP, TBCA, AP3B1, SCAMP1, LHFPL2, ARSB, DMGDH, BHMT2, BHMT, JMY, HOMER1, PAPD4, CMYA5, THBS4, SERINC5, DHFR, MSH3, CKMT2, ACOT12, SSBP2, ATG10, RPS23, XRCC4, CSPG2, HAPLN1, EDIL3, COX7C, RASA1, CCNH, MEF2C, CETN3, POLR3G, MASS1, ARRDC3, NR2F1, ANKRD32, MCTP1, FAM81B, SPATA9, RHOBTB3, GLRX, ELL2, PCSK1, CAST, ARTS-1, LRAP, LNPEP, LIX1, RIOK2, RGMB, ZNF366, PRP2, ZFYVE16 |
| <b>Gain of 1p34.3-1p34.2</b>                                 | MYCBP, MYCL1, RLF, RRAGC, BMP8A, BMP8B, GJA10, RHBDL2, MACF1, PABPC4, NDUFS5, HEYL, KCNQ4, CTPS, NFYC, RIMS3, SCM1, EDN2, HIVEP3, SMAP1L, COL9A2, CAP1, PPT1, MFSD2, TRIT1, PPIE, HPCAL4, NT5C1A, ZMPSTE24                                                                                                                                                                                                                                                                                                                                                                                                                                                                                   |
